# Supplementary material for: Facile synthesis of an ultra-stable metal–organic framework with excellent acid and base resistance
Source: Royal Society of Chemistry journal article supplement (doi:10.1039/c7fd00017k), 2017-01-01
Supplement: c7fd00017k1.pdf [file c7fd00017k1.pdf]

*Electronic Supplementary Information (ESI)*

**Facile synthesis of an ultra-stable metal-organic framework  
with excellent acid and base resistance**

Nian Zhao, Ping Li, Xin Mu, Chuanfang Liu, Fuxing Sun\* and

Guangshan Zhu\*

*State Key Laboratory of Inorganic Synthesis and Preparative Chemistry,*

*College of Chemistry, Jilin University. Changchun, China 130012*

*Email: zhugs@jlu.edu.cn*

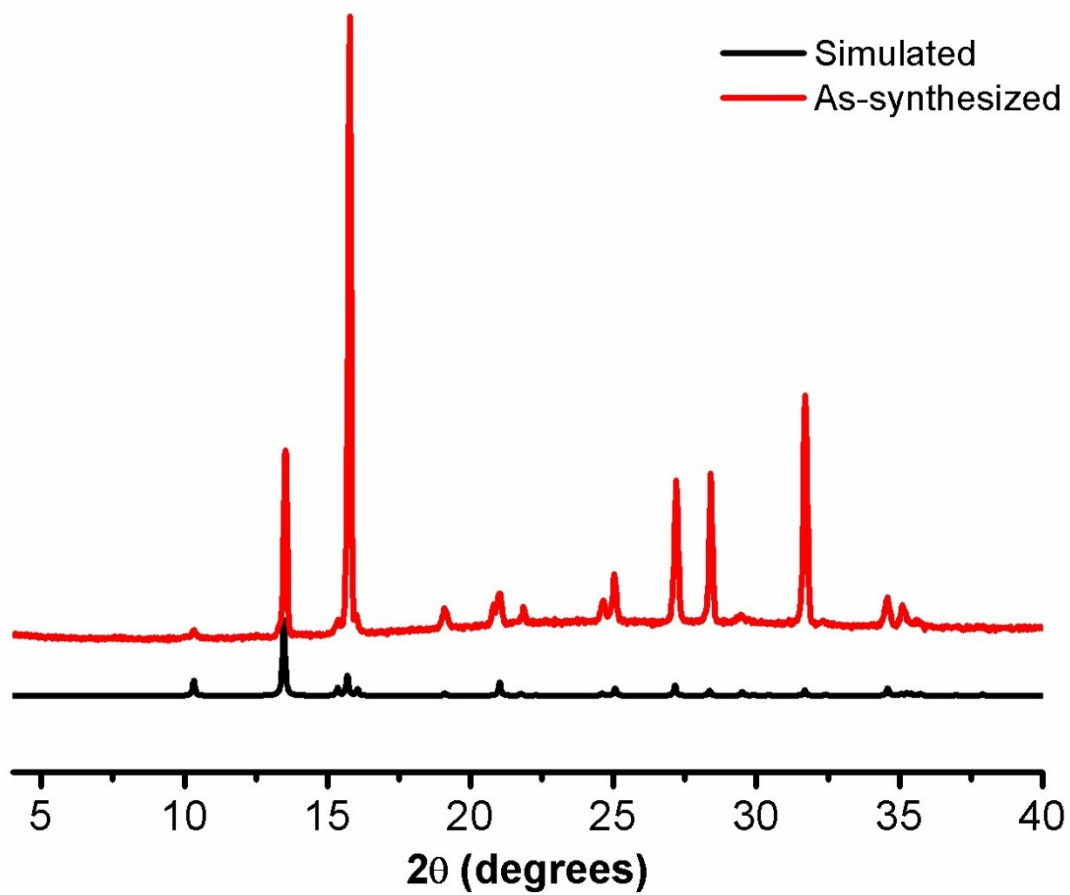

Figure S1. The PXRD pattern of MCIF-1.

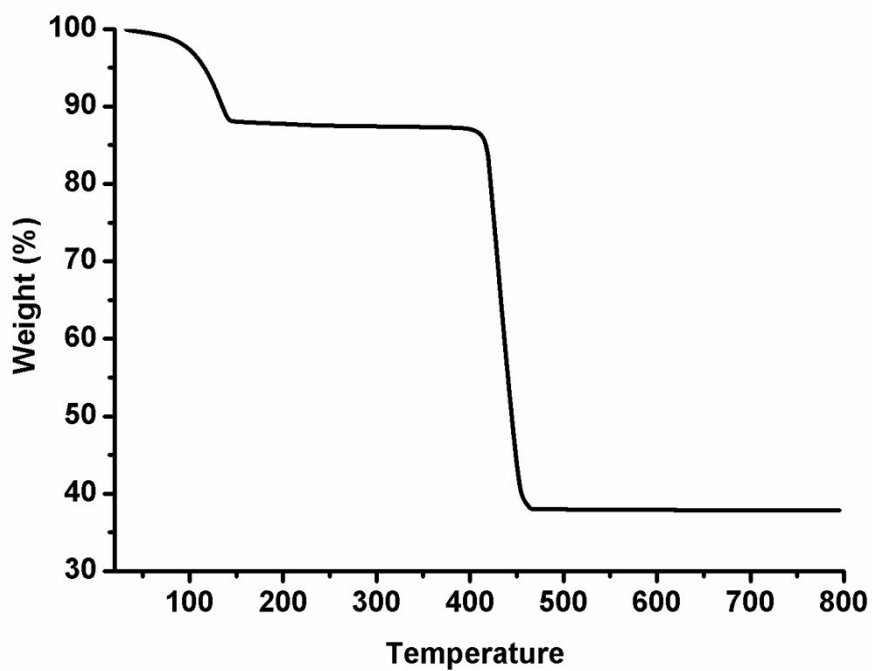

Figure S2. The TG curve of MCIF-1.

**Table S1.** Crystal data and structure refinement for 1.

|                                   |                                                               |          |
|-----------------------------------|---------------------------------------------------------------|----------|
| Identification code               | 1                                                             |          |
| Empirical formula                 | C <sub>12</sub> H <sub>5</sub> Cu <sub>2</sub> N <sub>9</sub> |          |
| Formula weight                    | 402.35                                                        |          |
| Temperature                       | 293(2) K                                                      |          |
| Wavelength                        | 0.71073 Å                                                     |          |
| Crystal system                    | Tetragonal                                                    |          |
| Space group                       | I4 <sub>1</sub> 22                                            |          |
| Unit cell dimensions              | a = 9.281(17) Å                                               | α = 90°. |
|                                   | b = 9.281(17) Å                                               | β = 90°. |
|                                   | c = 22.07(5) Å                                                | γ = 90°. |
| Volume                            | 1901(8) Å <sup>3</sup>                                        |          |
| Z                                 | 4                                                             |          |
| Density (calculated)              | 1.406 Mg/m <sup>3</sup>                                       |          |
| Absorption coefficient            | 2.247 mm <sup>-1</sup>                                        |          |
| F(000)                            | 792                                                           |          |
| Crystal size                      | 0.150 x 0.100 x 0.100 mm <sup>3</sup>                         |          |
| Theta range for data collection   | 3.104 to 28.517°.                                             |          |
| Index ranges                      | -10 ≤ h ≤ 12, -12 ≤ k ≤ 12, -26 ≤ l ≤ 29                      |          |
| Reflections collected             | 5753                                                          |          |
| Independent reflections           | 1215 [R(int) = 0.1513]                                        |          |
| Completeness to theta = 25.242°   | 99.8 %                                                        |          |
| Absorption correction             | Semi-empirical from equivalents                               |          |
| Refinement method                 | Full-matrix least-squares on F <sup>2</sup>                   |          |
| Data / restraints / parameters    | 1215 / 12 / 76                                                |          |
| Goodness-of-fit on F <sup>2</sup> | 1.056                                                         |          |
| Final R indices [I > 2σ(I)]       | R1 = 0.0721, wR2 = 0.1753                                     |          |
| R indices (all data)              | R1 = 0.0993, wR2 = 0.1951                                     |          |
| Absolute structure parameter      | 0.46(10)                                                      |          |
| Extinction coefficient            | n/a                                                           |          |
| Largest diff. peak and hole       | 1.738 and -1.168 e.Å <sup>-3</sup>                            |          |
